# Supplementary material
Source: Springer Nature journal article supplement (https://www.springermedizin.de/resource/supplementary/12974_2013_980_MOESM3_ESM.pdf/9600566)
Supplement: MOESM3 [file 9600566]

**Additional file 3: Table S3. Analysis of differentially expressed entities identified using GeneSpring**

| <b>Genbank</b>   | <b>Gene</b>   | <b>Gene Name</b>                                             | <b>Fold</b>   | <b>P-value</b> |
|------------------|---------------|--------------------------------------------------------------|---------------|----------------|
| <b>Accession</b> | <b>Symbol</b> |                                                              | <b>Change</b> |                |
| NM_008491        | Lcn2          | Lipocalin 2                                                  | 16.58         | 8.27E-06       |
| NM_011315        | Saa3          | Serum amyloid A3                                             | 8.69          | 1.91E-04       |
| BC150711         | AI607873      | Interferon activated gene 204<br>homologue                   | 3.93          | 7.84E-05       |
| NM_011854        | Oasl2         | 2'-5' Oligoadenylate synthetase-<br>like 2                   | 3.91          | 1.25E-04       |
| NM_025378        | Ifitm3        | Interferon induced transmembrane<br>protein                  | 3.69          | 3.91E-05       |
| NM_009252        | Serpina3n     | Serine (or cysteine) peptidase<br>inhibitor, clade A         | 3.32          | 1.65E-04       |
| NM_009099        | Trim30        | Tripartite motif-containing 30                               | 3.28          | 9.56E-05       |
| NM_008331        | Ifit1         | Interferon-induced protein with<br>tetratricopeptide repeats | 3.12          | 1.05E-04       |
| NM_008329        | Ifi204        | Interferon activated gene 204                                | 3.05          | 6.68E-05       |
| NM_133871        | Ifi44         | Interferon activated gene 44                                 | 2.94          | 1.44E-04       |
| NM_023386        | Rtp4          | Receptor transporter protein 4                               | 2.93          | 4.51E-05       |
| NM_021274        | Cxcl10        | chemokine (C-X-C motif) ligand<br>10                         | 2.91          | 8.88E-05       |
| NM_144559        | Fcgr4         | Fc receptor, IgG, low affinity IV                            | 2.90          | 2.18E-05       |
| NM_011150        | Lgals3bp      | Lectin, galactoside-binding,<br>soluble, 3 binding protein   | 2.89          | 5.40E-05       |

|              |                          |                                                                                    |      |          |
|--------------|--------------------------|------------------------------------------------------------------------------------|------|----------|
| NM_194336    | Gbp6                     | Guanylate binding protein 6                                                        | 2.70 | 4.41E-06 |
| NM_013563    | Il2rg                    | Interleukin 2 receptor, gamma chain                                                | 2.64 | 4.41E-06 |
| ---          | N/A*                     |                                                                                    | 2.60 | 4.42E-05 |
| NM_001001892 | H2-K1                    | Histocompatibility 2, K1, K region                                                 | 2.49 | 4.42E-05 |
| NM_010260    | Gbp2                     | Guanylate binding protein 2                                                        | 2.42 | 1.13E-04 |
| NM_028595    | Ms4a6c                   | Membrane-spanning 4-domains, subfamily A, member 6C                                | 2.40 | 1.91E-04 |
| AK173199     | Rnf213 L<br>OC67251<br>1 | Ring finger protein 213                                                            | 2.34 | 5.92E-07 |
| NM_009402    | Pglyrp1                  | Peptidoglycan recognition protein 1                                                | 2.36 | 8.03E-05 |
| ---          | Rnf213**                 | Ring finger protein 213                                                            | 2.33 | 1.36E-05 |
| NM_009982    | Ctsc                     | Cathepsin C                                                                        | 2.31 | 5.42E-05 |
| NM_010738    | Ly6a                     | Lymphocyte antigen 6 complex, locus A                                              | 2.29 | 1.60E-05 |
| NM_018734    | Gbp3                     | Guanylate binding protein 3                                                        | 2.28 | 1.60E-04 |
| NM_172689    | Ddx58                    | DEAD box polypeptide 58                                                            | 2.27 | 1.26E-04 |
| NM_145545    | Gbp7                     | Guanylate binding protein 7                                                        | 2.27 | 3.80E-06 |
| NM_009780    | C4b  C4a                 | complement component 4B (Childo blood group)   complement 4A (Rodgers blood group) | 2.24 | 1.40E-04 |

|              |          |                                                        |      |          |
|--------------|----------|--------------------------------------------------------|------|----------|
| NM_013673    | Sp100    | Nuclear antigen Sp100                                  | 2.22 | 4.61E-05 |
| NM_026835    | Ms4a6d   | Membrane-spanning 4-domains,<br>subfamily A, member 6D | 2.21 | 4.36E-05 |
| NM_008326    | Irgm     | Immunity-related GTPase family<br>M member 1           | 2.21 | 2.56E-05 |
| NM_013805    | Cldn5    | Claudin 5                                              | 2.10 | 1.42E-04 |
| ---          | Rnf213** | Ring finger protein 213                                | 2.08 | 2.78E-05 |
| NM_199146    | AI451617 | Expressed sequence AI451617                            | 2.06 | 8.85E-05 |
| NM_009283    | Stat1    | Signal transducer and activator of<br>transcription 1  | 2.04 | 5.75E-06 |
| ---          | Rnf213** | Ring finger protein 213                                | 2.02 | 2.69E-06 |
| NM_153564    | GBP5     | Guanylate binding protein 5                            | 2.02 | 5.17E-05 |
| NM_001160415 | Apobec3  | Apolipoprotein B mRNA editing<br>enzyme                | 2.02 | 2.07E-05 |

---

Significance was calculated using an unpaired t-test and a Benjamini-Hochberg multiple testing correction.

\*Probe sets don't map to annotated genes

\*\*Annotations manually determined using Affymetrix online database, NetAffx
